# Supplementary material for: Comparative genomics of vertebrate Fox cluster loci
Source: PubMed Central journal article supplement (PMC1634998; doi:10.1186/1471-2164-7-271), 2006-10-24
Supplement: 1471-2164-7-271-S1.pdf [file 1471-2164-7-271-S1.pdf]

# Additional file 1 – Gene family introduction and phylogeny interpretation

## List of abbreviations

|           |                                      |
|-----------|--------------------------------------|
| <i>Ac</i> | <i>Amia calva</i>                    |
| <i>Am</i> | <i>Apis mellifera</i>                |
| <i>Bf</i> | <i>Branchiostoma floridae</i>        |
| <i>Bt</i> | <i>Bos Taurus</i>                    |
| <i>Ce</i> | <i>Caenorhabditis elegans</i>        |
| <i>Ci</i> | <i>Ciona intestinalis</i>            |
| <i>Cf</i> | <i>Canis familiaris</i>              |
| <i>Dm</i> | <i>Drosophila melanogaster</i>       |
| <i>Dp</i> | <i>Drosophila pseudoobscura</i>      |
| <i>Dr</i> | <i>Danio rerio</i>                   |
| <i>Fr</i> | <i>Fugu rubripes</i>                 |
| <i>Gg</i> | <i>Gallus gallus</i>                 |
| <i>Hs</i> | <i>Homo sapiens</i>                  |
| <i>Mm</i> | <i>Mus musculus</i>                  |
| <i>Pt</i> | <i>Pan troglodytes</i>               |
| <i>Rn</i> | <i>Rattus norvegicus</i>             |
| <i>Sp</i> | <i>Strongylocentrotus purpuratus</i> |
| <i>Tn</i> | <i>Tetraodon nigroviridis</i>        |
| <i>Xl</i> | <i>Xenopus laevis</i>                |
| <i>Xt</i> | <i>Xenopus tropicalis</i>            |

**Below, we present a figure showing NCBI Map Viewer data of paralogous regions of the human genome. These data are summarised in Figure 1, and form the basis for its construction. We then give a brief introduction to each gene family discussed in the paper, followed by a summary of the molecular phylogenetic analysis and its interpretation. This is followed by a table giving accession numbers or other identifiers for the sequences used in these analyses. The trees resulting from the molecular phylogenetic analyses can be found in Additional File 2.**

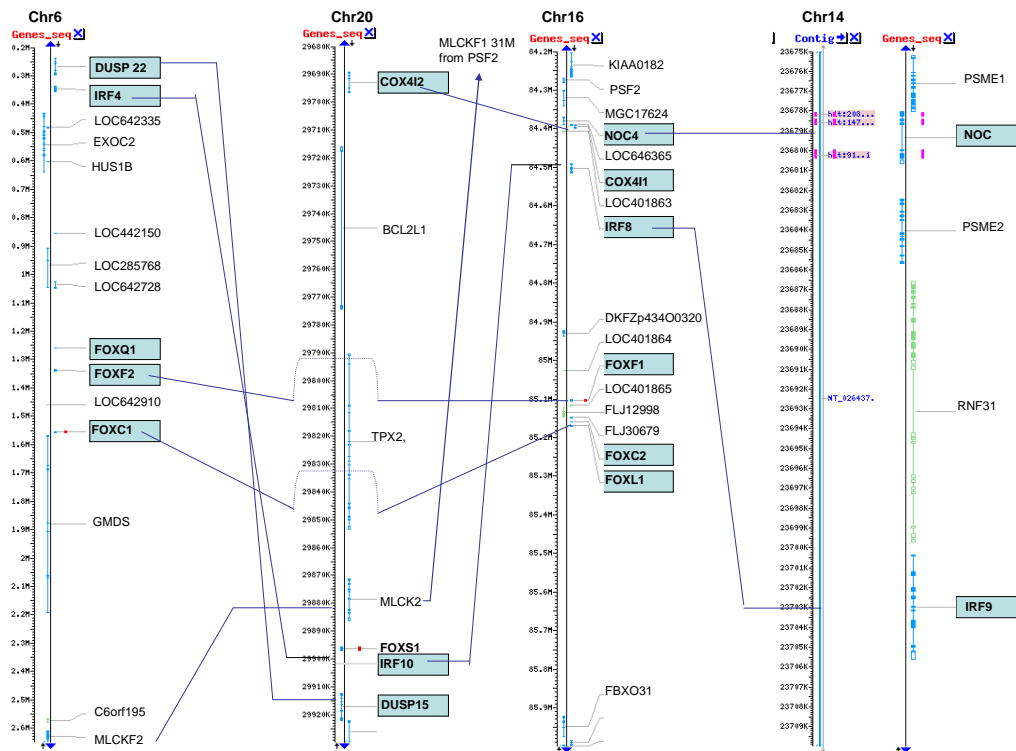

**Figure 1 - Human paralogs of the FOX cluster loci.** The views were generated by NCBI map viewer Hs Build 36.1 (Nov 01, 2005) by annotating genes onto genomic contigs. This includes known genes, and putative genes placed as a result of alignment of ESTs and mRNAs to the contigs. The view also includes BLAST hits found during this study. Regions of chromosomes (Chr) 6, 20, 16 and 14 are shown. The scale is in Mb for chromosomes 6 and 16, and in Kb for chromosomes 20 and 14. Lines connecting genes on different chromosomes indicate paralogy inferred by BLAST and subsequently confirmed by molecular phylogenetic analysis.

## Gene Family introductions and analyses

### The Fox gene family

*FOXQ1* starts the Human 300kb chromosome 6 FOX cluster consisting of *FOXQ1*, *FOXF2* and *FOXC1* separated by 59kb and 215kb respectively (see Figure 1). Only one predicted gene appears in the cluster between *FOXF2* and *FOXC1*. e-PCR suggest LOC642910 be a pseudogene with similarity to *E74*-like factor 2 isoform 2. The Human chromosome 16 cluster spans 70kb with three genes found between *FOXF1* and *FOXC2*. The first, LOC401865 is a probable pseudogene with similarity to *60S ribosomal protein L7a*, the second, *FLJ12998*, is a novel gene with a conserved 5-formyltetrahydrofolate cyclo-ligase family domain. Homologous genes are also located next to *FoxF1* in mammals, *Gallus gallus*, *Xenopus tropicalis* and the teleost genomes. The third, *FLJ30679*, shows no homology to other genes. In this cluster *FOXC2* is 54kb from *FOXF1* and 10kb from *FOXL1*.

Mazet et al. (2003) resolved the phylogeny of the Fox gene family to show a close relationship between the *FoxL1* and *FoxC* subclasses and between the *FoxF* and *FoxQ1* subclasses [1]. The human gene *FREAC10* (now called *FOXS1*) resolved basally to the *FoxC* subclass in these analyses, but did not group with any other Fox genes.

Maximum likelihood analysis of the Fox genes *FoxF*, *FoxC*, *FoxL1*, *FoxQ1* and *FoxS1* was carried out using the forkhead domains of these genes. The tree was rooted using a human *FOXK1* sequence. All subfamilies include the amphioxus representative except for FoxS1 (where no gene has been identified).

The results essentially confirm previous studies [1] with the *FoxL1*, *FoxS1* and *FoxC* subfamilies most closely related to each other as are the *FoxQ1* and FoxF subfamilies. A previously *FoxC1* predicted chicken gene (automated computational analysis using GNOMON) branches as a *FoxS1* gene. Vertebrate *FoxF* and *FoxC* duplicates resolve within the FoxF and FoxC subfamilies as expected, however the high sequence identity between the duplicates in the forkhead domain reduces the resolution of these parts of the tree. To clarify this, separate trees were produced for each subset of genes using extended alignments. The Fox duplicates then resolved with high bootstrap values supporting the paralogy and synteny of the genomic regions identified in this study.

*G. gallus FOXC1* was previously identified from a cDNA library [2] and is not represented in the FoxC tree due to doubtful 5' sequence. RACE used to extend the 5' end of the cDNA gave what is likely to be partial *FOXC2* sequence. Trees produced using more 3' regions of this gene confirm its placement as a *FOXC1*. No *FoxC2* genes have been found in the genomes of teleost fish, however, in this study *foxc1* and *foxc2* genes have been cloned from *Amia calva*, a sister group to the teleosts [3] and are included in the *FoxC* tree. This finding suggests the *foxc2* loss to be teleost specific.

Primers used to clone *foxc1* and *foxc2* from *A. calva* genomic DNA.

|                |    |     |     |     |     |     |     |     |     |    |
|----------------|----|-----|-----|-----|-----|-----|-----|-----|-----|----|
| <b>Forward</b> |    | M   | Q   | A   | R   | Y   | S/P | V   |     |    |
| TetCfor        | 5' | ATG | CAG | GCN | MGN | TAY | HSN | GT  | 3'  |    |
| <b>Reverse</b> |    | S   | G   | N   | E/D | F   | M   | N   | Y   |    |
| Lopfoxc2       | 5' | A   | GCC | GTT | NTC | RAA | CAT | RTT | RTA | 3' |

Accession numbers for the *A. calva* sequences are AM402970 and AM402971

### The IRF gene family

The IRF (interferon regulatory factor) family is a group of transcription factors that share homology in the DNA-binding domain [4, 5]. IRFs are mostly involved in the regulation of immune responses, in particular against viral infection. It has been suggested the IRF genes arose early in vertebrate evolution from a prototypical protein with a *myb*-like DNA binding motif [6, 7]. Interestingly the *IRF* genes also encode a winged helix DNA binding domain with similarity to that encoded by the *Fox* genes, however the significance of this is unclear.

Maximum likelihood analysis of IRF sequences recovered previously described relationships among the IRF genes [6], and extended these due to expansion in the number and phylogenetic range of Irf sequences used. The tree is rooted with a *Strongylocentrotus purpuratus* (purple sea urchin) *Irf* sequence though it is unclear if this gene is an outgroup to all vertebrate IRF genes. Nehyba (2002) split the IRF

genes into four subfamilies, the IRF-1 subfamily contains the *Irf1* and *Irf2* genes, the IRF-5 subfamily contains the *Irf5* and *Irf6* genes, the IRF-3 subfamily contains the *Irf3* and *Irf7* genes and finally the IRF-4 subfamily contains the *Irf4*, *Irf8*, *Irf9* and *Irf10* genes as indicated on the tree.

Human *IRF10* has diverged to such an extent that it cannot produce a full length protein [6] and no mouse *Irf10* has been found (hence their omission from this analysis). However definitive *Irf10*-like sequences were recovered from the genomes of other mammals (not shown) and from other vertebrate genomes

Genes from the IRF-4 subfamily map to the genomic regions under consideration here, and in our analysis form a distinct group supported by a value of 85, indicating they are more closely related to each other than to the other IRF subfamilies. This supports our interpretation of *Irf4*, *Irf8*, *Irf9* and *Irf10* as paralogous genes derived from block duplications

### **The Dusp gene family**

The Dusp (Dual specificity phosphatases) genes are a subclass of the protein tyrosine phosphatase (PTP) superfamily involved in the dephosphorylation of threonine and tyrosine residues in MAP kinase [8]. This is a large gene family, with over 20 representatives in the human genome. Maximum likelihood analysis of approximately 160 amino acids around the Dusp active site was used to produce the phylogenetic tree, which is rooted with a *C. elegans Dusp* sequence. Though some parts of the tree are supported by low bootstrap values, it does show the three genes under consideration here, *Dusp22*, *Dusp15* and *DuspF1*, to be closely related to each other, with a support value of 97. Sequences from *D. melanogaster* and *D. pseudoobscura* group basally to these genes suggesting them to be the orthologous to the vertebrate genes. A subfamily tree drawn using these genes resolves the relationship with high bootstrap values.

### **The COX4 gene family**

COX4 (Cytochrome c oxidase subunit IV) forms part of the electron transport chain responsible for aerobic energy metabolism. Two types have been identified, named isoform 1 (I1) and isoform 2 (I2). In Humans *COX4I1* is located on chromosome 16 and shares a promoter with *NOC4* [9]; see below) while *COX4I2* is on chromosome 20. Expression analysis in rats has shown *Cox4I1* to be expressed ubiquitously, while *Cox4I2* shows high expression in adult lung with lower expression in all other tissue investigated [10]. No *Noc* related gene has been identified linked to *Cox4I2*. In the human genome a hypothetical protein (LOC646365) has been annotated overlapping with *COX4I1*, however this is likely a mis-annotation as some of the protein sequence encoded by this gene is that of the COX4I1 protein.

*Cox4* orthologues were identified in *C. elegans*, *A. gambiae* and *S. purpuratus* and various vertebrates. Maximum likelihood analysis shows *Cox4I1* and *Cox4I2* to be paralogous genes with the duplication event producing them occurring somewhere between the sea urchin and teleost lineages. No *Cox4I2* was identified from the genomes of *G. gallus* or teleosts. The *cox4* gene found on chromosome 23 in the *D. rerio* genome falls outside both established vertebrate groups. As it is situated

44.65Mb from *irf10*, its presence of chromosome 23 cannot be considered informative.

### **The NOC4 gene family**

*NOC4* (Neighbour of COX4) is a novel gene of unknown function that shares its promoter with *COX4I1* on human chromosome 16 and whose expression appears to be ubiquitous [9]. Bachman et al (1999) found no significant homologies to known proteins, however, searches of the human genome in our study revealed a second *NOC* homologue 19kb from *IRF9* on chromosome 14 of the human genome, which we provisionally name here as *NOC9* signifying its linkage to *IRF9*.

*NOC* orthologues were identified in *C. elegans* (used to root the tree), *D. melanogaster*, *A. gambiae* and *S. purpuratus* and various vertebrates. Maximum likelihood analysis of these genes shows *Noc4* and *Noc9* to be paralogous genes with the duplication event producing them occurring somewhere between the sea urchin and teleost lineages. In *D. rerio* a third *noc* gene is found on chr12 and is not linked to an *irf9* gene. No *NOC9* or *IRF9* was found in the genome of the chicken.

### **The MLCK gene family**

The MLCK (Myosin light chain kinase) gene family encodes enzymes involved in muscle contraction and myosin regulation [11-15].

Sequences were collected from *D. melanogaster* (known as *twitchin*), *C. elegans* (known as *stretchin*) and various vertebrates. Maximum likelihood analysis of these sequences reveals three vertebrate gene groups. *Mlck2* has been previously named, here we call the others *Mlckf1* and *Mlckf2* to signify their linkage to *FoxF1* and *FoxF2* respectively. However while *Mlckf1* is found linked to the *FoxF1-FoxC1-FoxL1* cluster in mammals and *G. gallus* it is several Mb distant. *Mlckf1* was not identified in the genomes of *X. tropicalis*, *F. rubripes* or *T. nigrovirdis*. The *D. rerio* gene has not been mapped. *Mlck2* is linked to *Irf10* in amniotes but has not been mapped in *D. rerio* or identified in the other teleosts. The relationship of these vertebrate *Mlck* genes supports the paralogy and synteny of the genomic regions identified in this study.

### **Other genes**

Several other genes for which molecular phylogenetics were not undertaken are shown in Figure 1. Molecular phylogenetics were not undertaken either because of insufficient sequence information, or more typically because there appears to be only one homolog associated with the paralogous gene families described above.

**EXOC2.** The exocyst complex component 2 protein is a component of the exocyst complex which targets exocytic vesicles to docking sites on the plasma membrane (Entrez gene). A blast search with overlapping LOC642335 protein hits EXOC2 in *P. troglodytes*.

**HUS1B.** HUS1 checkpoint homolog b (*S. pombe*). *HUS1B* is a paralog of human *HUS1* with suggested roles in regulating cell cycle checkpoints and genomic integrity [16].

**GMDS.** GDP-mannose 4,6-dehydratase is the first enzyme in the pathway converting GDP-mannose to GDP-fucose [17].

**BCL.** Members of the **BCL-2** family act as anti or pro-apoptotic regulators and form hetero or homodimers involved in a wide variety of cellular activities (Entrez gene).

**TPX2** is a microtubule-associated homologue with a role in spindle assembly [18].

**PSF2.** Partner of Sld five 2 is a component of the GINS multiprotein complex involved in the initiation of DNA replication [19-21]. A second PSF2-like gene is found on chromosome 20.

**FBX031** is F-box protein 31 a ubiquitin ligase specificity factor [22].

**PSME** is proteasome activator subunit 1 and 2. These subunits are regulators of the immunoproteasome, an altered 26S proteasome that processes class I MHC peptides (Entrez gene).

**RNF31** is ring finger protein 31. The gene contains a ring finger motif known to be involved in protein-protein and protein-DNA interactions (Entrez gene).

### **Novel genes**

LOC442150, LOC285768, LOC642728, MGC17624, DKFZp43400320 are hypothetical genes without clear homologies to other genes.

### **Pseudogenes**

LOC401863 is similar to ribosomal protein L10a, LOC401865 is similar to chloride intracellular channel 1. Pseudogenes are also found in each FOX cluster (detailed above).

### **References**

1. Mazet F, Yu JK, Liberles DA, Holland LZ, Shimeld SM: **Phylogenetic relationships of the Fox (Forkhead) gene family in the Bilateria.** *Gene* 2003, **316**:79-89.
2. Buchberger A, Schwarzer M, Brand T, Pabst O, Seidl K, Arnold HH: **Chicken winged-helix transcription factor cFKH-1 prefigures axial and appendicular skeletal structures during chicken embryogenesis.** *Dev Dyn* 1998, **212**:94-101.
3. Kikugawa K, Katoh K, Kuraku S, Sakurai H, Ishida O, Iwabe N, Miyata T: **Basal jawed vertebrate phylogeny inferred from multiple nuclear DNA-coded genes.** *BMC Biol* 2004, **2**:3.

4. Harada H, Taniguchi T, Tanaka N: **The role of interferon regulatory factors in the interferon system and cell growth control.** *Biochimie* 1998, **80**:641-650.
5. Mamane Y, Heylbroeck C, Genin P, Algarte M, Servant MJ, LePage C, DeLuca C, Kwon H, Lin R, Hiscott J: **Interferon regulatory factors: the next generation.** *Gene* 1999, **237**:1-14.
6. Nehyba J, Hrdlickova R, Burnside J, Bose HR, Jr.: **A novel interferon regulatory factor (IRF), IRF-10, has a unique role in immune defense and is induced by the v-Rel oncoprotein.** *Mol Cell Biol* 2002, **22**:3942-3957.
7. Veals SA, Schindler C, Leonard D, Fu XY, Aebersold R, Darnell JE, Jr., Levy DE: **Subunit of an alpha-interferon-responsive transcription factor is related to interferon regulatory factor and Myb families of DNA-binding proteins.** *Mol Cell Biol* 1992, **12**:3315-3324.
8. Camps M, Nichols A, Arkinstall S: **Dual specificity phosphatases: a gene family for control of MAP kinase function.** *Faseb J* 2000, **14**:6-16.
9. Bachman NJ, Wu W, Schmidt TR, Grossman LI, Lomax MI: **The 5' region of the COX4 gene contains a novel overlapping gene, NOC4.** *Mamm Genome* 1999, **10**:506-512.
10. Huttemann M, Kadenbach B, Grossman LI: **Mammalian subunit IV isoforms of cytochrome c oxidase.** *Gene* 2001, **267**:111-123.
11. Teichmann SA, Chothia C: **Immunoglobulin superfamily proteins in Caenorhabditis elegans.** *J Mol Biol* 2000, **296**:1367-1383.
12. Champagne MB, Edwards KA, Erickson HP, Kiehart DP: **Drosophila stretchin-MLCK is a novel member of the Titin/Myosin light chain kinase family.** *J Mol Biol* 2000, **300**:759-777.
13. Potier MC, Chelot E, Pekarsky Y, Gardiner K, Rossier J, Turnell WG: **The human myosin light chain kinase (MLCK) from hippocampus: cloning, sequencing, expression, and localization to 3qcen-q21.** *Genomics* 1995, **29**:562-570.
14. Fong S, Hamill SJ, Proctor M, Freund SM, Benian GM, Chothia C, Bycroft M, Clarke J: **Structure and stability of an immunoglobulin superfamily domain from twitchin, a muscle protein of the nematode Caenorhabditis elegans.** *J Mol Biol* 1996, **264**:624-639.
15. Ayme-Southgate A, Vigoreaux J, Benian G, Pardue ML: **Drosophila has a twitchin/titin-related gene that appears to encode projectin.** *Proc Natl Acad Sci U S A* 1991, **88**:7973-7977.
16. Hang H, Zhang Y, Dunbrack RL, Jr., Wang C, Lieberman HB: **Identification and characterization of a paralog of human cell cycle checkpoint gene HUS1.** *Genomics* 2002, **79**:487-492.
17. Sullivan FX, Kumar R, Kriz R, Stahl M, Xu GY, Rouse J, Chang XJ, Boodhoo A, Potvin B, Cumming DA: **Molecular cloning of human GDP-mannose 4,6-dehydratase and reconstitution of GDP-fucose biosynthesis in vitro.** *J Biol Chem* 1998, **273**:8193-8202.
18. Garrett S, Auer K, Compton DA, Kapoor TM: **hTPX2 is required for normal spindle morphology and centrosome integrity during vertebrate cell division.** *Curr Biol* 2002, **12**:2055-2059.
19. Obama K, Ura K, Satoh S, Nakamura Y, Furukawa Y: **Up-regulation of PSF2, a member of the GINS multiprotein complex, in intrahepatic cholangiocarcinoma.** *Oncol Rep* 2005, **14**:701-706.

20. Takayama Y, Kamimura Y, Okawa M, Muramatsu S, Sugino A, Araki H: **GIN5, a novel multiprotein complex required for chromosomal DNA replication in budding yeast.** *Genes Dev* 2003, **17**:1153-1165.
21. Kubota Y, Takase Y, Komori Y, Hashimoto Y, Arata T, Kamimura Y, Araki H, Takisawa H: **A novel ring-like complex of *Xenopus* proteins essential for the initiation of DNA replication.** *Genes Dev* 2003, **17**:1141-1152.
22. Jin J, Cardozo T, Lovering RC, Elledge SJ, Pagano M, Harper JW: **Systematic analysis and nomenclature of mammalian F-box proteins.** *Genes Dev* 2004, **18**:2573-2580.



## Sequence accession and equivalent identification numbers

The tables below give accession numbers or equivalent for sequences used in molecular phylogenetic analyses. Tree name indicates the name used on the phylogenetic tree for the family. Location is the chromosome (Chr) or scaffold (S) number (if known). Databases are as follows

AN: Genbank: <http://www.ncbi.nlm.nih.gov/>

JGI: Joint Genome Institute: <http://genome.jgi-psf.org/>

E: Ensembl gene identifier: <http://www.ensembl.org/index.html>

Hm: Gnomon model number on map viewer: <http://www.ncbi.nlm.nih.gov/>

| <b>MLCK sequences</b> |                 |                   |                 |
|-----------------------|-----------------|-------------------|-----------------|
| <b>Tree name</b>      | <b>Location</b> | <b>ID Number</b>  | <b>Database</b> |
| BtF1chr18             | Chr18           | XP_604749.2       | AN              |
| BtF2                  |                 | XP_596207.2       | AN              |
| CeTwitchin            |                 | CAA33463.1        | AN              |
| DmStretchin           |                 | NP_523754.2       | AN              |
| Dr2                   |                 | XP_687022.1       | AN              |
| DrF1                  |                 | CAE49228.1        | AN              |
| DrF2aChr20            | Chr20           | XP_697572.1       | AN              |
| DrF2b                 |                 | XP_695224.1       | AN              |
| FrF2as129             | S129            | 604718            | JGI             |
| FrF2bs107             | S107            | 580153            | JGI             |
| Gg2chr20              | Chr20           | NP_990723.1       | AN              |
| GgF1chr11             | Chr11           | XP_414113.1       | AN              |
| GgF2chr2              | Chr2            | XP_418978.1       | AN              |
| Hs2chr20              | Chr20           | NP_149109.1       | AN              |
| HsF1chr16             | Chr16           | AAI09097.1        | AN              |
| HsF2chr6              | Chr16           | CAI12220.1        | AN              |
| Mm2                   | Chr2            | XP_130630.6       | AN              |
| MmF1chr8              | Chr8            | BAC35177.1        | AN              |
| MmF2chr13             | Chr13           | XP_915653.1       | AN              |
| Rr2                   |                 | NP_476557.1       | AN              |
| TnF2bchr15            | Chr15           | GSTENP00016215001 | E               |
| XtF2s95               | S95             | 329016            | JGI             |

| <b>NOC sequences</b> |                 |                   |                 |
|----------------------|-----------------|-------------------|-----------------|
| <b>Tree name</b>     | <b>Location</b> | <b>ID Number</b>  | <b>Database</b> |
| AgNOC                |                 | XP_554509.1       | AN              |
| BtNOCchr10           | Chr10           | XP_586913.2       | AN              |
| CeF25H2.4            |                 | NP_492760.1       | AN              |
| CfNOC4chr5           | Chr5            | XP_536760.2       | AN              |
| CfNOCchr8            | Chr8            | XP_537381.2       | AN              |
| DmNOC                |                 | NP_611731.1       | AN              |
| DrNOC4chr18          | Chr18           | NP_998535.1       | AN              |
| DrNOCchr12           | Chr12           | NP_956420.1       | AN              |
| DrNOCchr20           | Chr20           | XP_692545.1       | AN              |
| FrNOC4s96            | S96             | 712068            | JGI             |
| FrNOCs14             | S14             | 292321            | JGI             |
| GgNOC4chr11          | Chr11           | XP_414188.1       | AN              |
| HsNOC4chr16          | Chr16           | NP_006058.1       | AN              |
| HsNOCchr14           | Chr14           | NM_016049         | AN              |
| MmNOC4chr8           | Chr8            | NP_035056.1       | AN              |
| MmNOCchr14           | Chr14           | NP_149158.1       | AN              |
| SpNOC4               |                 | XP_787518.1       | AN              |
| TnNOCchr5            | Chr5            | GSTENP00017647001 | E               |
| TnNOCchrUn           | ChrUn           | GSTENT00016547001 | E               |
| XICOX4               |                 | AAH63338.1        | AN              |
| XINOC                |                 | AAI06463.1        | AN              |
| XtNOC4s188           | S188            | 454231            | JGI             |

| <b>COX4 sequences</b> |                 |                  |                 |
|-----------------------|-----------------|------------------|-----------------|
| <b>Tree name</b>      | <b>Location</b> | <b>ID Number</b> | <b>Database</b> |
| AgCox4                |                 | XP_557879.1      | AN              |
| BtI1chr18             | Chr18           | NP_001001439.1   | AN              |
| BtI2chr13             | Chr13           | XP_875763.1      | AN              |
| CeCOX4                |                 | NP_493394.1      | AN              |
| CfI1chr5              | Chr5            | XP_536759.1      | AN              |
| CfI2chr24             | Chr24           | XP_542949.2      | AN              |
| DrCOXchr23            | Chr23           | NP_957097.1      | AN              |
| DrI1chr18             | Chr18           | NP_999866.1      | AN              |
| FrI1S14               | S14             | 749214           | JGI             |
| GgI1chr11             | Chr11           | NP_001025748.1   | AN              |
| HsI1chr16             | Chr16           | NP_001852.1      | AN              |
| HsI2chr20             | Chr20           | NP_115998.2      | AN              |
| MmI1chr8              | Chr8            | NP_034071.1      | AN              |
| Mmi2chr2              | Chr2            | NP_444321.1      | AN              |
| PtI1chr16             | Chr16           | XP_511235.1      | AN              |
| PtI2chr20             | Chr20           | XP_525298.1      | AN              |
| SpCOX4                |                 | XP_796538.1      | AN              |
| XtI1s188              | S188            | 169573           | JGI             |

**COX4 sequences**

| Tree name | Location | ID Number      | Database |
|-----------|----------|----------------|----------|
| XtI2s95   | S95      | NP_001016945.1 | AN       |

**DUSP sequences**

| Tree name   | Location | ID Number      | Database |
|-------------|----------|----------------|----------|
| AgDUSP      |          | XP_320303.2    | AN       |
| CeDUSP      |          | NP_501053.2    | AN       |
| Dm          |          | NP_729909.1    | AN       |
| DmDUSP      |          | NP_649087.1    | AN       |
| Dp          |          | GA10063-PA     | AN       |
| Dr1         |          | NP_998232.1    | AN       |
| Dr1522chr18 | Chr18    | NP_001002514.1 | AN       |
| Dr19        |          | NP_998144.1    | AN       |
| Dr22chrUn   | ChrUn    | NW_643208.1    | AN       |
| Dr23        |          | NP_001034709.1 | AN       |
| Dr4         |          | NP_957465.1    | AN       |
| Dr5         |          | NP_997730.1    | AN       |
| Dr7         |          | AAH66600.1     | AN       |
| Fr1522s14   | S14      | 749213         | JGI      |
| Fr22s107    | S107     | 580074         | JGI      |
| Fr22s351    | S351     | 576242         | JGI      |
| Frs180      |          | 605441         | JGI      |
| Gg10        |          | NP_001026215.1 | AN       |
| Gg15chr20   | Chr20    | XP_417451.1    | AN       |
| Gg16        |          | XP_428887.1    | AN       |
| Gg22chr2    | Chr2     | XP_418974.1    | AN       |
| Gg6         |          | NP_989685.1    | AN       |
| Hs1         |          | NP_004408.1    | AN       |
| Hs10        |          | NP_009138.1    | AN       |
| Hs11        |          | NP_003575.1    | AN       |
| Hs12        |          | AAH06286.1     | AN       |
| Hs13        |          | CAI40905.1     | AN       |
| Hs14        |          | CAG46599.1     | AN       |
| Hs15chr20   | Chr20    | CAI12821.1     | AN       |
| Hs16        |          | AAH42101.1     | AN       |
| Hs18        |          | AAH30987.1     | AN       |
| Hs19        |          | AAH93958.1     | AN       |
| Hs2         |          | NP_004409.1    | AN       |
| Hs21        |          | NP_071359.2    | AN       |
| Hs22Chr6    | Chr6     | NP_064570.1    | AN       |
| Hs23        |          | NP_060293.2    | AN       |
| Hs24        |          | Q9Y6J8         | AN       |

| <b>DUSP sequences</b> |                 |                   |                 |
|-----------------------|-----------------|-------------------|-----------------|
| <b>Tree name</b>      | <b>Location</b> | <b>ID Number</b>  | <b>Database</b> |
| Hs26                  |                 | AAH67804.1        | AN              |
| Hs27                  |                 | XP_940528.1       | AN              |
| Hs3                   |                 | AAH35701.1        | AN              |
| Hs4                   |                 | NP_001385.1       | AN              |
| Hs5                   |                 | NP_004410.3       | AN              |
| Hs6                   |                 | NP_001937.2       | AN              |
| Hs7                   |                 | NP_001938.1       | AN              |
| Hs8                   |                 | AAH38231.1        | AN              |
| Hs9                   |                 | NP_001386.1       | AN              |
| Mm1                   |                 | NP_038670.1       | AN              |
| Mm10                  |                 | AAH25066.1        | AN              |
| Mm11                  |                 | AAH28640.1        | AN              |
| Mm12                  |                 | AAH99453.1        | AN              |
| Mm13                  |                 | AAI00422.1        | AN              |
| Mm14                  |                 | NP_062793.2       | AN              |
| Mm15chr2              | Chr2            | NP_665687.1       | AN              |
| Mm16                  |                 | AAH57321.1        | AN              |
| Mm18                  |                 | AAH20036.1        | AN              |
| Mm19                  |                 | AAH21591.1        | AN              |
| Mm2                   |                 | AAH48696.1        | AN              |
| Mm21                  |                 | NP_082844.1       | AN              |
| Mm22chr13             | Chr13           | NP_001033044.1    | AN              |
| Mm23                  |                 | NP_081001.1       | AN              |
| Mm26                  |                 | AAH18204.1        | AN              |
| Mm27                  |                 | NP_00102851       | AN              |
| Mm3                   |                 | Q9D7X3            | AN              |
| Mm4                   |                 | NP_795907.1       | AN              |
| Mm6                   |                 | NP_080544.1       | AN              |
| Mm7                   |                 | NP_703189.1       | AN              |
| Mm8                   |                 | AAH52705.1        | AN              |
| Mm9                   |                 | NP_083628.3       | AN              |
| Rn24                  |                 | AAH98678.1        | AN              |
| Rn5                   |                 | NP_598262.1       | AN              |
| Tn1522chr5            | Chr5            | GSTENT00017648001 | E               |
| Tn22chrUn             | ChrUn           | GSTENT00009638001 | E               |
| Xt1522s188            | S188            | 201026            | JGI             |
| Xt22s211              | S211            | 170578            | JGI             |

| <b>IRF sequences</b> |                 |                  |                 |
|----------------------|-----------------|------------------|-----------------|
| <b>Tree name</b>     | <b>Location</b> | <b>ID Number</b> | <b>Database</b> |
| Bt10chr13            | Chr13           | hmm248044        | HM              |
| Bt4chrUn             | ChrUn           | XP_870405.1      | AN              |
| Bt8Chr18             | Chr18           | hmm42785         | HM              |
| Bt9Chr10             | Chr10           | AAX46743.1       | AN              |
| Cf10chr24            | Chr24           | hmm45655         | HM              |
| Cf4chr35             | Chr35           | hmm314           | HM              |
| Cf8chr5              | Chr5            | hmm37927         | AN              |
| Dr1?                 |                 | AAQ97797.1       | AN              |
| Dr10chr23            | Chr23           | NM_212879        | AN              |
| Dr3chr12             | Chr12           | XP_693269.1      | AN              |
| Dr3chr15             | Chr15           | XP_694284.1      | AN              |
| Dr4achrUn            | ChrUn           | AF320331_1       | AN              |
| Dr4bChr20            | Chr20           | hmm79540         | HM              |
| Dr8chrUn             | ChrUn           | NM_001002622     | AN              |
| Dr9chr20             | Chr20           | NM_205710        | AN              |
| DrIRF6               |                 | AAH56772.1       | AN              |
| DrIRF7               |                 | AAH65902.1       | AN              |
| Fr10s180             | S180            | 605425           | JGI             |
| Fr4aS107             | S107            | 580063           | JGI             |
| Fr4s351              | S351            | 576245           | JGI             |
| Fr8s14               | S14             | 749212           | JGI             |
| Fr9s96               | S96             | 613411           | JGI             |
| Gg1                  |                 | NP_990746        | AN              |
| Gg10chr20            | Chr20           | NP_989889.1      | AN              |
| Gg2                  |                 | CAA64748.1       | AN              |
| Gg3?                 |                 | Q90643           | AN              |
| Gg4chr2              | Chr2            | NP_989630.1      | AN              |
| Gg5                  |                 | CAG32068.1       | AN              |
| Gg8chr11             | Chr11           | Q90871           | AN              |
| Hs1                  |                 | NP_002189.1      | AN              |
| Hs2                  |                 | NP_002190.1      | AN              |
| Hs3                  |                 | Q14653           | AN              |
| Hs4chr6              | Chr6            | AAH15752.1       | AN              |
| Hs5                  |                 | Q13568           | AN              |
| Hs7                  |                 | NP_001563.2      | AN              |
| Hs8chr16             | Chr16           | Q02556           | AN              |
| Hs9Chr14             | Chr14           | Q00978           | AN              |
| Mm1                  |                 | NP_032416.1      | AN              |
| Mm2                  |                 | NP_032417.2      | AN              |
| Mm3                  |                 | P70671           | AN              |

| <b>IRF sequences</b> |                 |                    |                 |
|----------------------|-----------------|--------------------|-----------------|
| <b>Tree name</b>     | <b>Location</b> | <b>ID Number</b>   | <b>Database</b> |
| Mm4chr13             | Chr13           | CAI24563.1         | AN              |
| Mm5                  |                 | P56477             | AN              |
| Mm7                  |                 | NP_058546.1        | AN              |
| Mm8chr8              | Chr8            | NP_03234           | AN              |
| Mm9chr14             | Chr14           | AAC52494.1         | AN              |
| Om?                  |                 | AF332147_1         | AN              |
| SpIRF                |                 | hmm23186           | HM              |
| SsIRF6               |                 | NP_999443.1        | AN              |
| Tn10                 | Chr9            | GSTENT00023713001  | E               |
| Tn4a                 | S11460          | GSTENT00009637001  | E               |
| Tn4b                 | S14546          | GSTENP00015662001  | E               |
| Tn8chr5              | Chr5            | GSTENT00017649001  | E               |
| Tn9                  |                 | GSTENT00016546001  | E               |
| Tr1?                 |                 | AF242447_1         | AN              |
| Xl1                  |                 | NP_001006695.1     | AN              |
| Xt10s1295            | S1295           | ENSXETP00000005434 | E               |
| Xt2                  |                 | NP_001008014.1     | AN              |
| Xt4s211              | S211            | 349993             | JGI             |
| Xt8s120              | S120            | 334257             | JGI             |
| Xt9s439              | S439            | 375197             | JGI             |
| XtIRF6               |                 | NP_001025493.1     | AN              |

| <b>Fox sequences</b> |                 |                  |                 |
|----------------------|-----------------|------------------|-----------------|
| <b>Tree name</b>     | <b>Location</b> | <b>ID Number</b> | <b>Database</b> |
| AcC1                 |                 |                  |                 |
| AcC2                 |                 |                  |                 |
| Bf                   |                 | AY9236           | AN              |
| BfC                  |                 | CAH69694         | AN              |
| BfF                  |                 | CAH69695         | AN              |
| BfL1                 |                 |                  |                 |
| BfQ1                 |                 | CAH55831         | AN              |
| BtS1                 | Chr13           | hmm247650        | HM              |
| CfS1                 | Chr24           | hmm45519         | HM              |
| CiF                  |                 | BAE06437.1       | AN              |
| DrC1a                | ChrUn           | NM_131728        | AN              |
| DrC1b                | Chr20           | NM_131729        | AN              |
| DrF1                 | Chr18           | XP_694768.1      | AN              |
| DrF2Chr20            |                 | hmm35595         | HM              |
| DrL1                 | Chr14           | NM_200984        | AN              |
| DrQ1                 | Chr20           | AAH67659         | AN              |
| FrC1s107             | s107            | 580056           | JGI             |

| <b>Fox sequences</b>    |                 |                   |                 |
|-------------------------|-----------------|-------------------|-----------------|
| <b>Tree name</b>        | <b>Location</b> | <b>ID Number</b>  | <b>Database</b> |
| FrC1s129                | S129            | 604756            | JGI             |
| FrF1s14                 | S14             | 611269            | JGI             |
| FrF2s107                | S107            | 580109            | JGI             |
| FrF2s129                | S129            | 604700            | JGI             |
| FrL1                    | s516            | 165281            | JGI             |
| FrQ1s107                | S107            | 580109            | JGI             |
| FrQ1s351                | S351            | 576230            | JGI             |
| GgC1 (cfkh-1)           |                 | NP_990337         | AN              |
| FOXSI (previously GgC1) | Chr2            | XP_427911.1       | AN              |
| GgC2chrUn               | ChrUn           | NP_990469.1       | AN              |
| GgF1                    | Chr11           | XP_414186.1       | AN              |
| HsC1                    | Chr6            | NM_001453         | AN              |
| HsC2                    | Chr16           | NM_005251         | AN              |
| HsF1                    | Chr16           | NM_001451         | AN              |
| HsF2                    |                 | NM_001452         | AN              |
| HsK1                    |                 | NP_00103224       | AN              |
| HsL1                    | Chr16           | NM_005250         | AN              |
| HsQ1                    | Chr6            | NP_150285.2       | AN              |
| HsS1                    | Chr20           | CAI12817.1        | AN              |
| MmC1                    | Chr13           | CAI25767          | AN              |
| MmC2                    | Chr8            | NP_038547         | AN              |
| MmF2                    | Chr13           | CAI25803          | AN              |
| MmL1                    |                 | XP_921996.1       | AN              |
| MmQ1                    | Chr13           | NM_008239         | AN              |
| MmS1                    | Chr2            | NP_034356         | AN              |
| PtS1                    | Chr20           | hmm7964           | HM              |
| SpC                     |                 | ABB89478.1        | AN              |
| SpL1                    |                 | XP_784909.1       | AN              |
| SpQ1                    |                 | ABB89489.1        | AN              |
| TnC1chr15               | Chr15           | GSTENP00016221001 | E               |
| TnC1s14546              | s14546          | GSTENT00015666001 | E               |
| TnF1                    | Chr5            | GSTENP00017651001 | E               |
| TnF2chr15               | Chr15           | GSTENT00016222001 | E               |
| TnF2s14546              | ChrUn           | GSTENT00015665001 | E               |
| TnQ1chr15               | Chr15           | GSTENP00016223001 | E               |
| TnQ1s14546              |                 | GSTENP00015665001 | E               |
| XtC1                    | s95             | NM_001007863      | AN              |
| XtC2                    | s181            | NM_213692         | AN              |
| XtF1                    |                 | 476259            | JGI             |
| XtF2s95                 | S95             | 91457             | JGI             |
| XtL1                    |                 | 345221            | JGI             |
| XtQ1                    |                 | ABA39837          | AN              |
