# Supplementary material for: Comparative genomics of vertebrate Fox cluster loci
Source: PubMed Central journal article supplement (PMC1634998; doi:10.1186/1471-2164-7-271), 2006-10-24

## Cox4 maximum likelihood tree

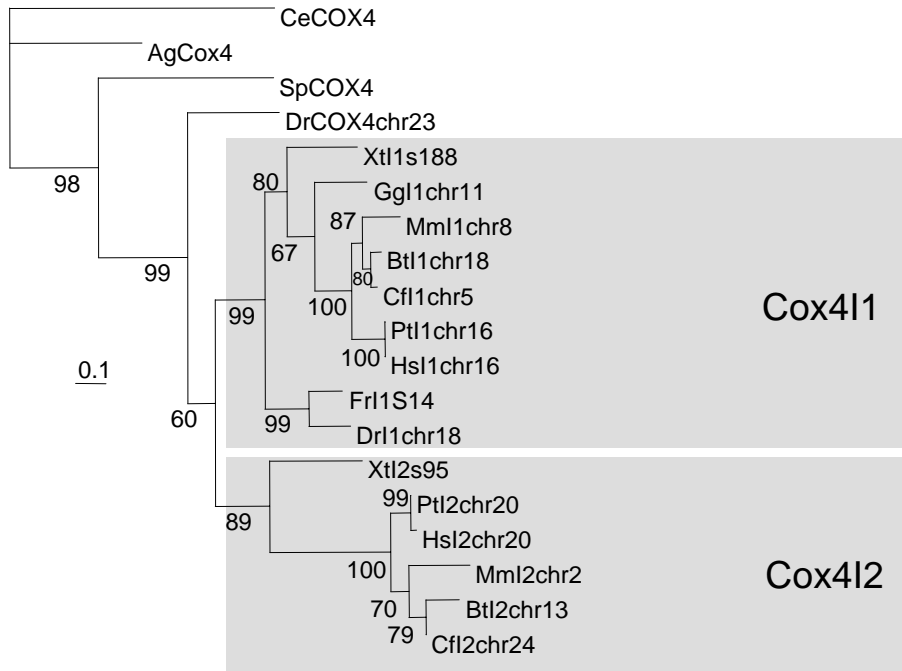

## Noc maximum likelihood tree

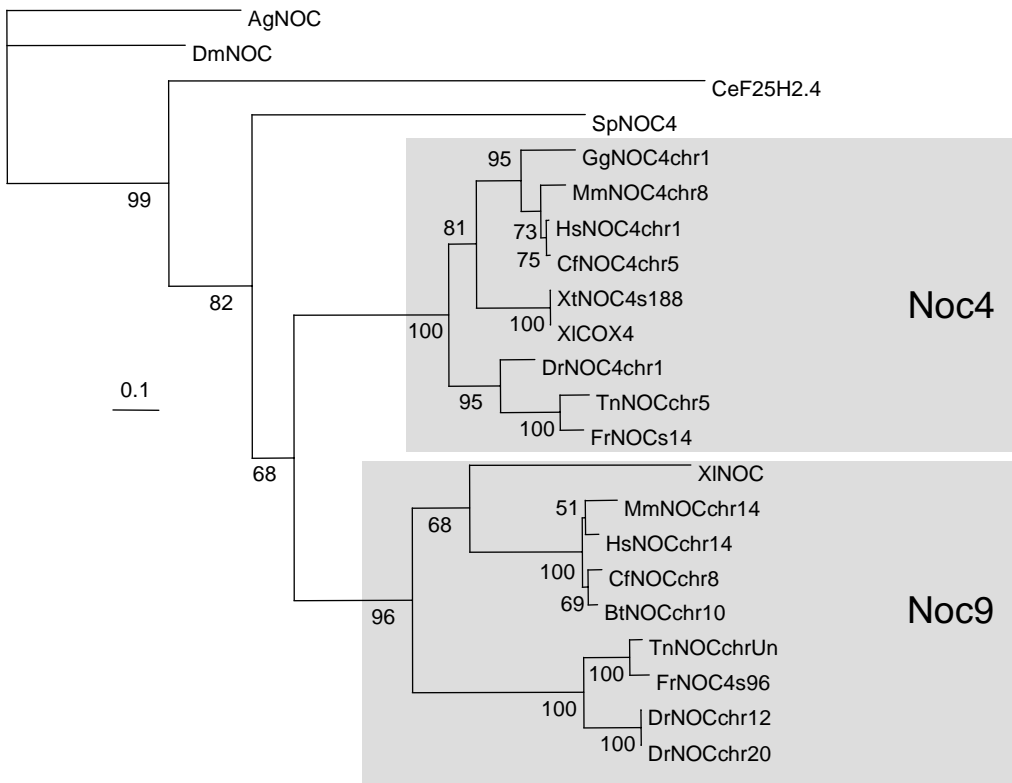

# Mlck maximum likelihood tree

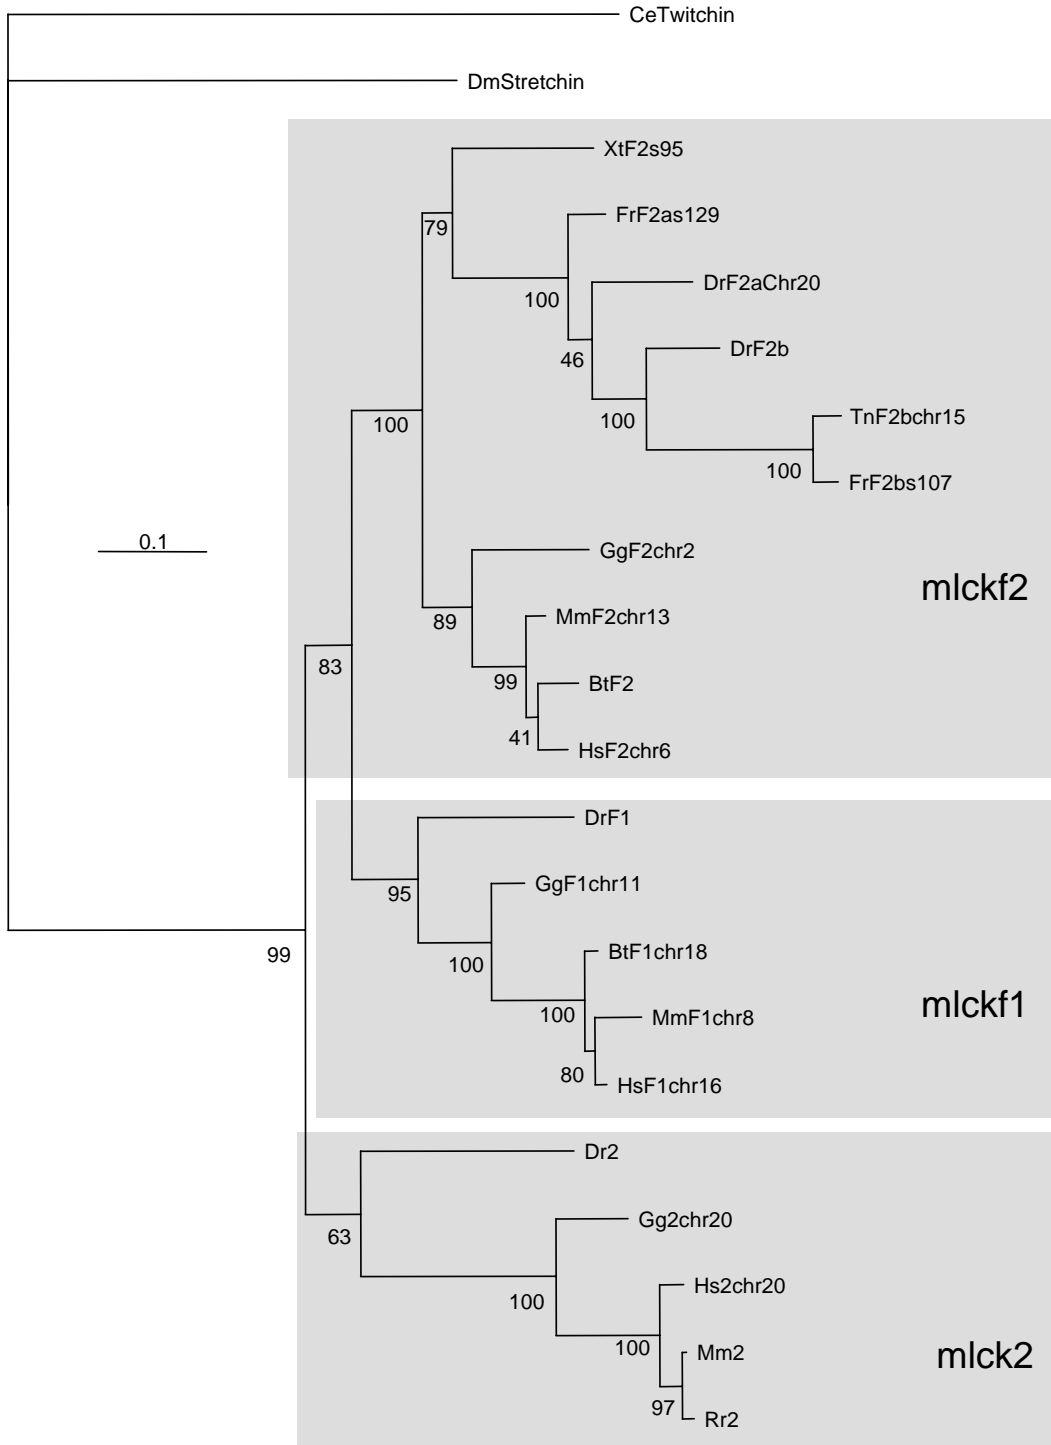

# Irf family maximum likelihood tree

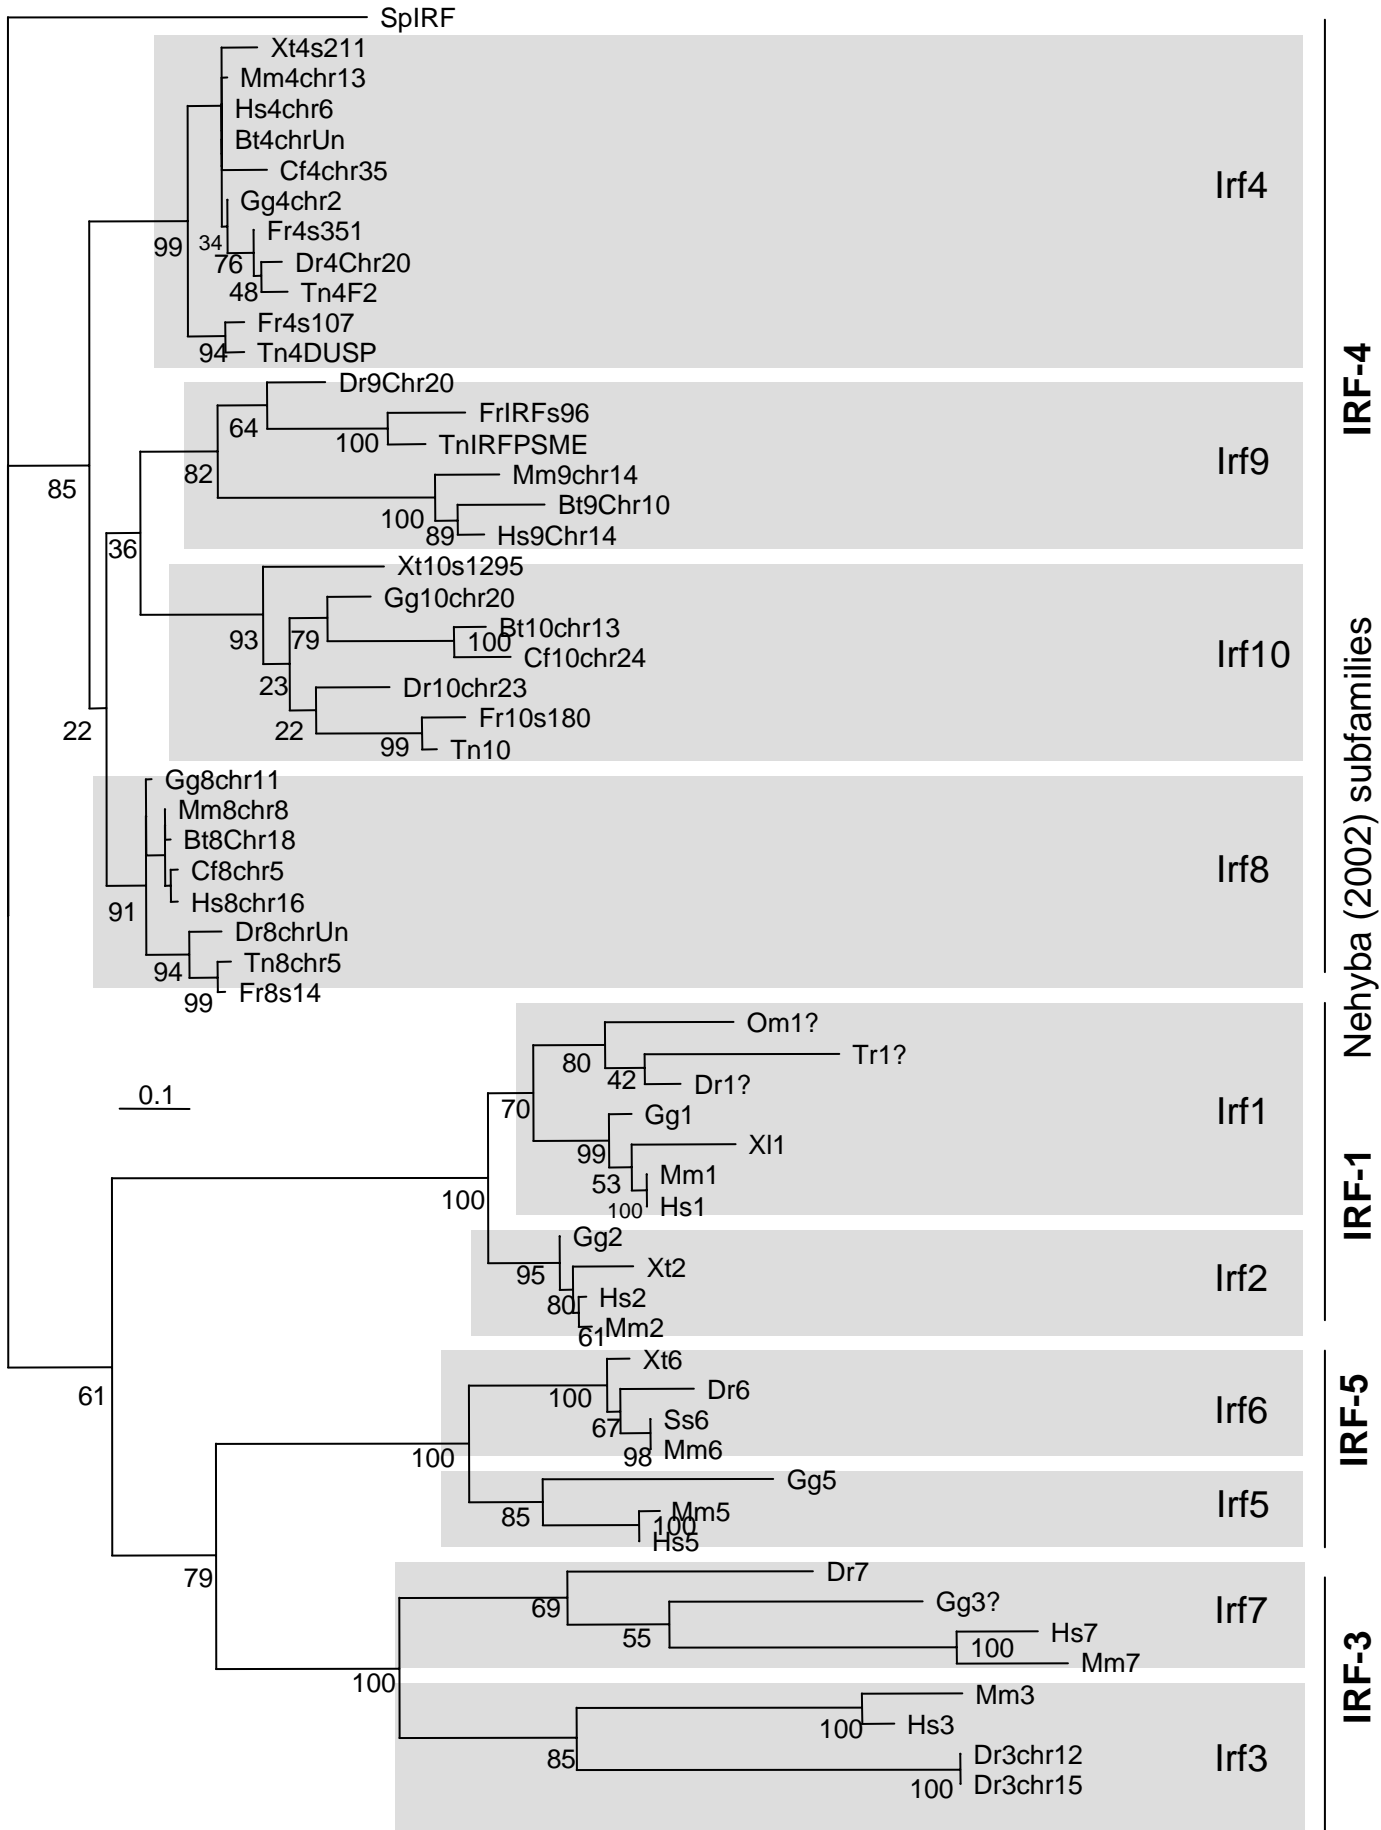

*FoxF, FoxQ1, FoxL1, FoxC and FoxS1* subfamily neighbour joining tree

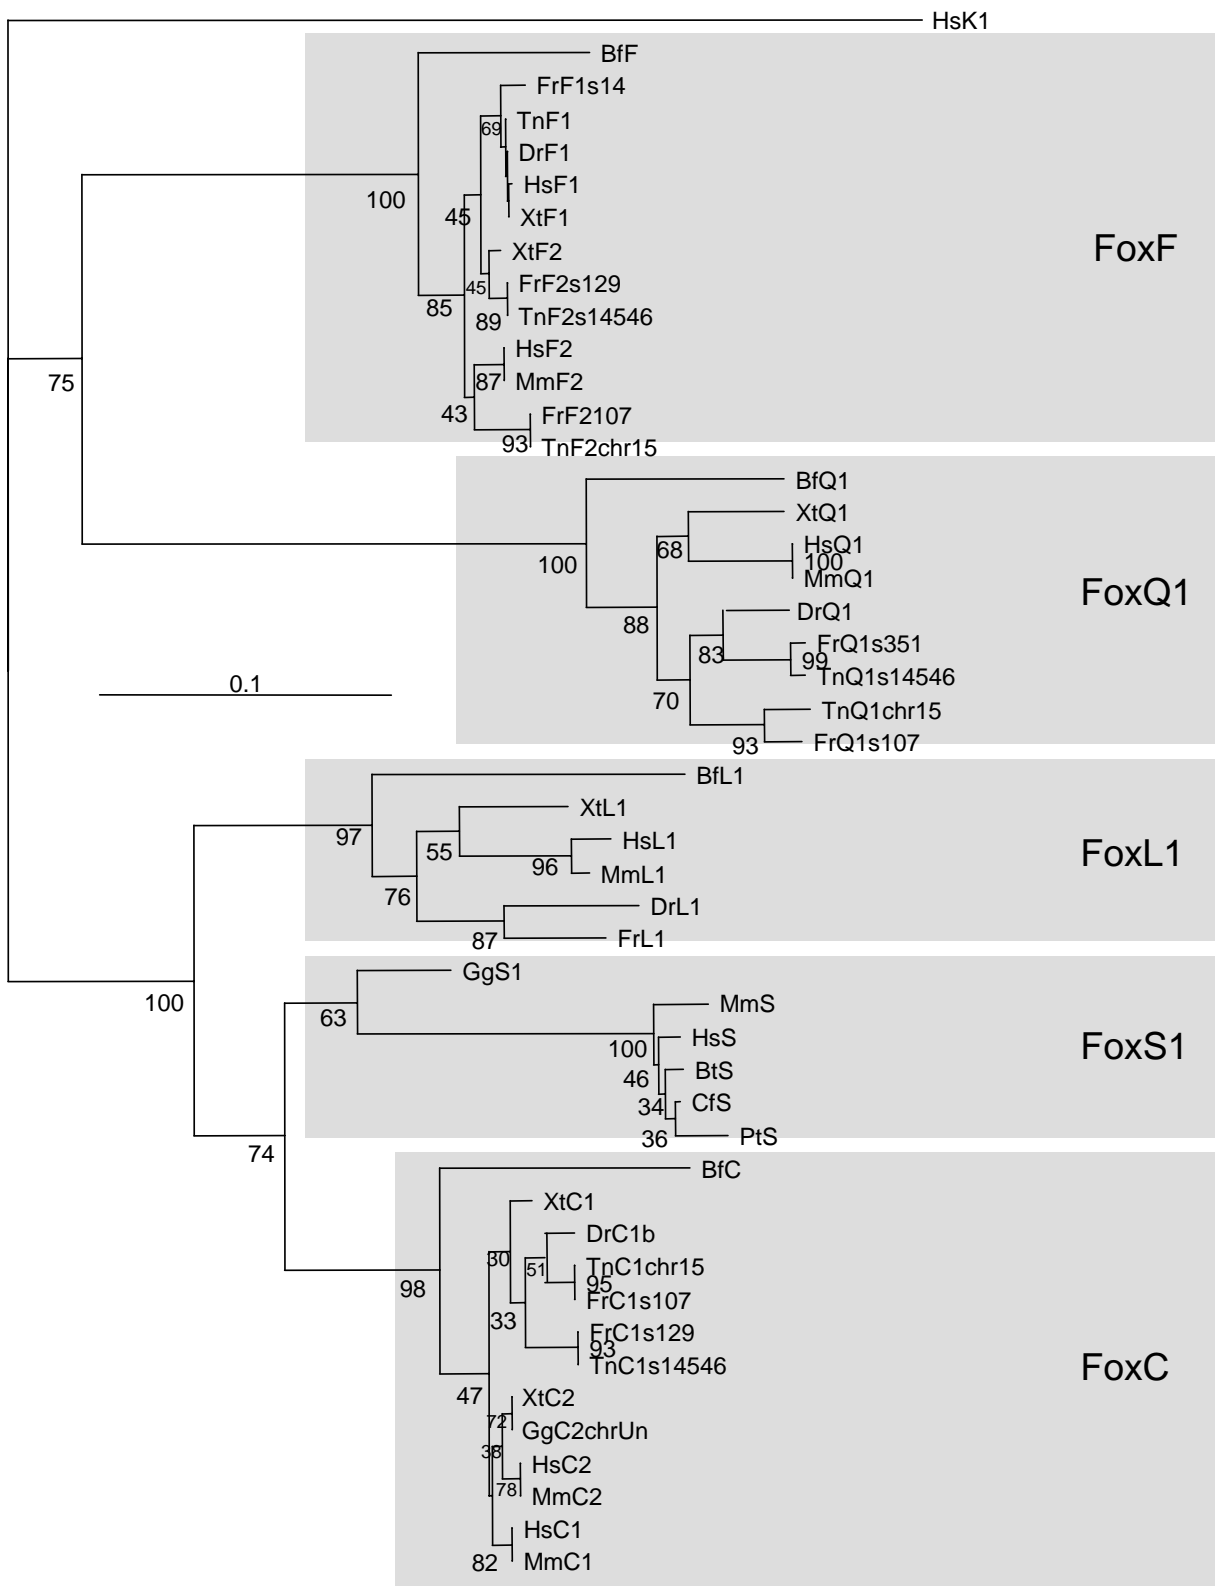

# FoxF, FoxC, FoxQ1, FoxL1 subfamily extended alignment maximum likelihood trees

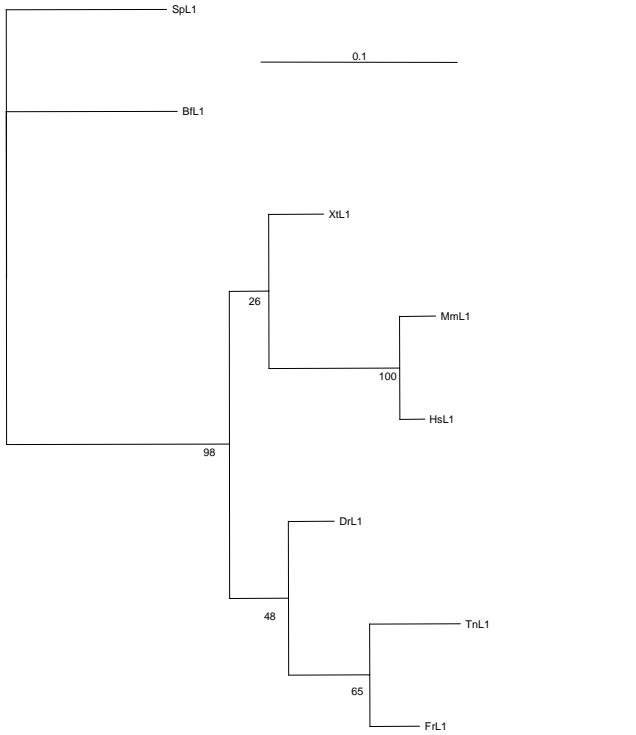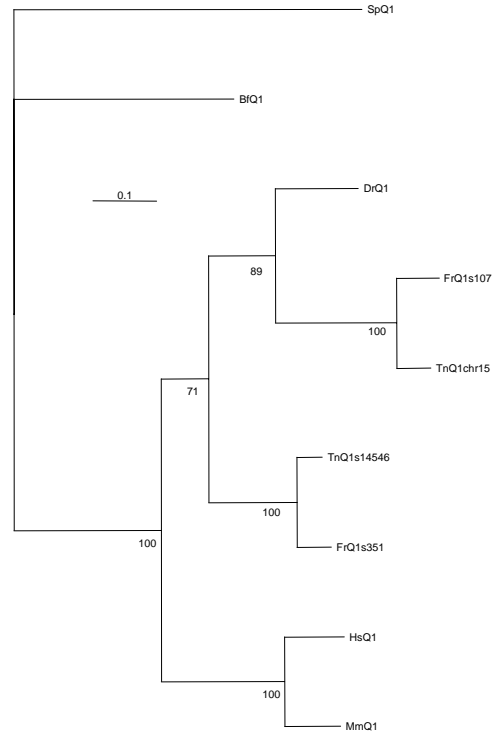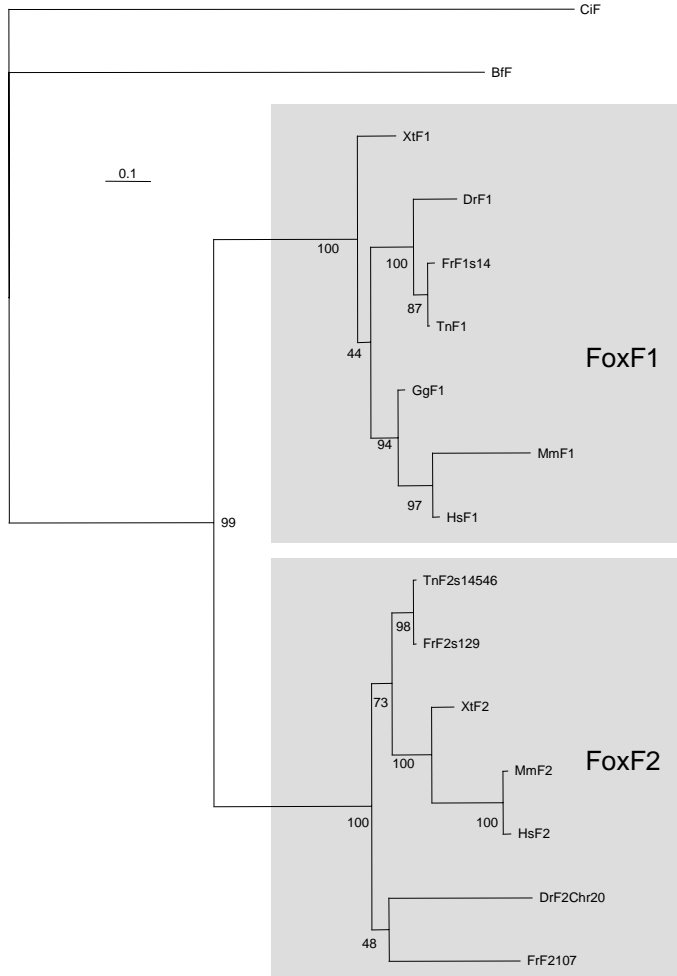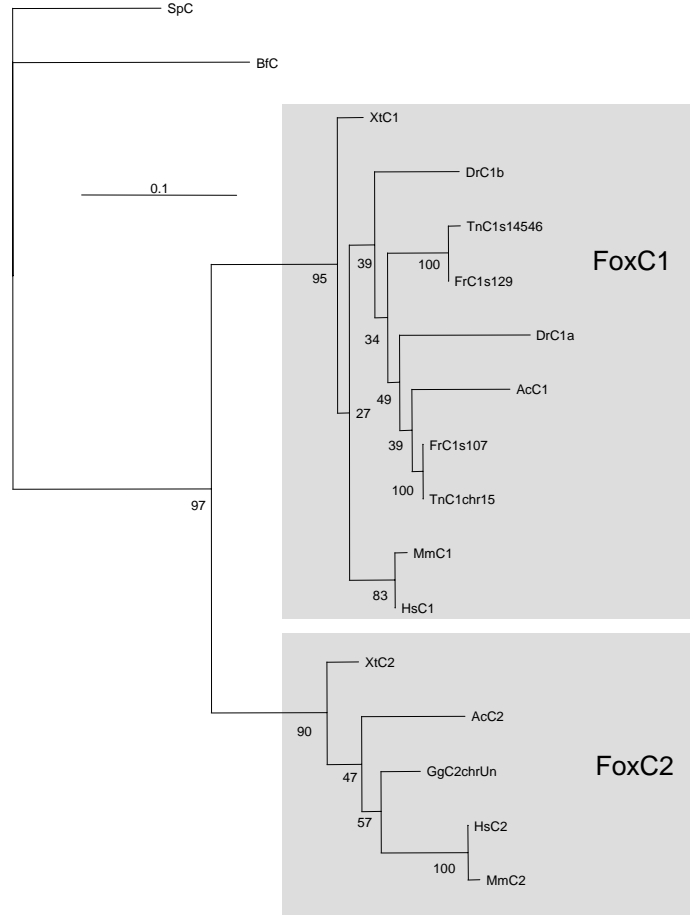

# Dusp family maximum likelihood tree

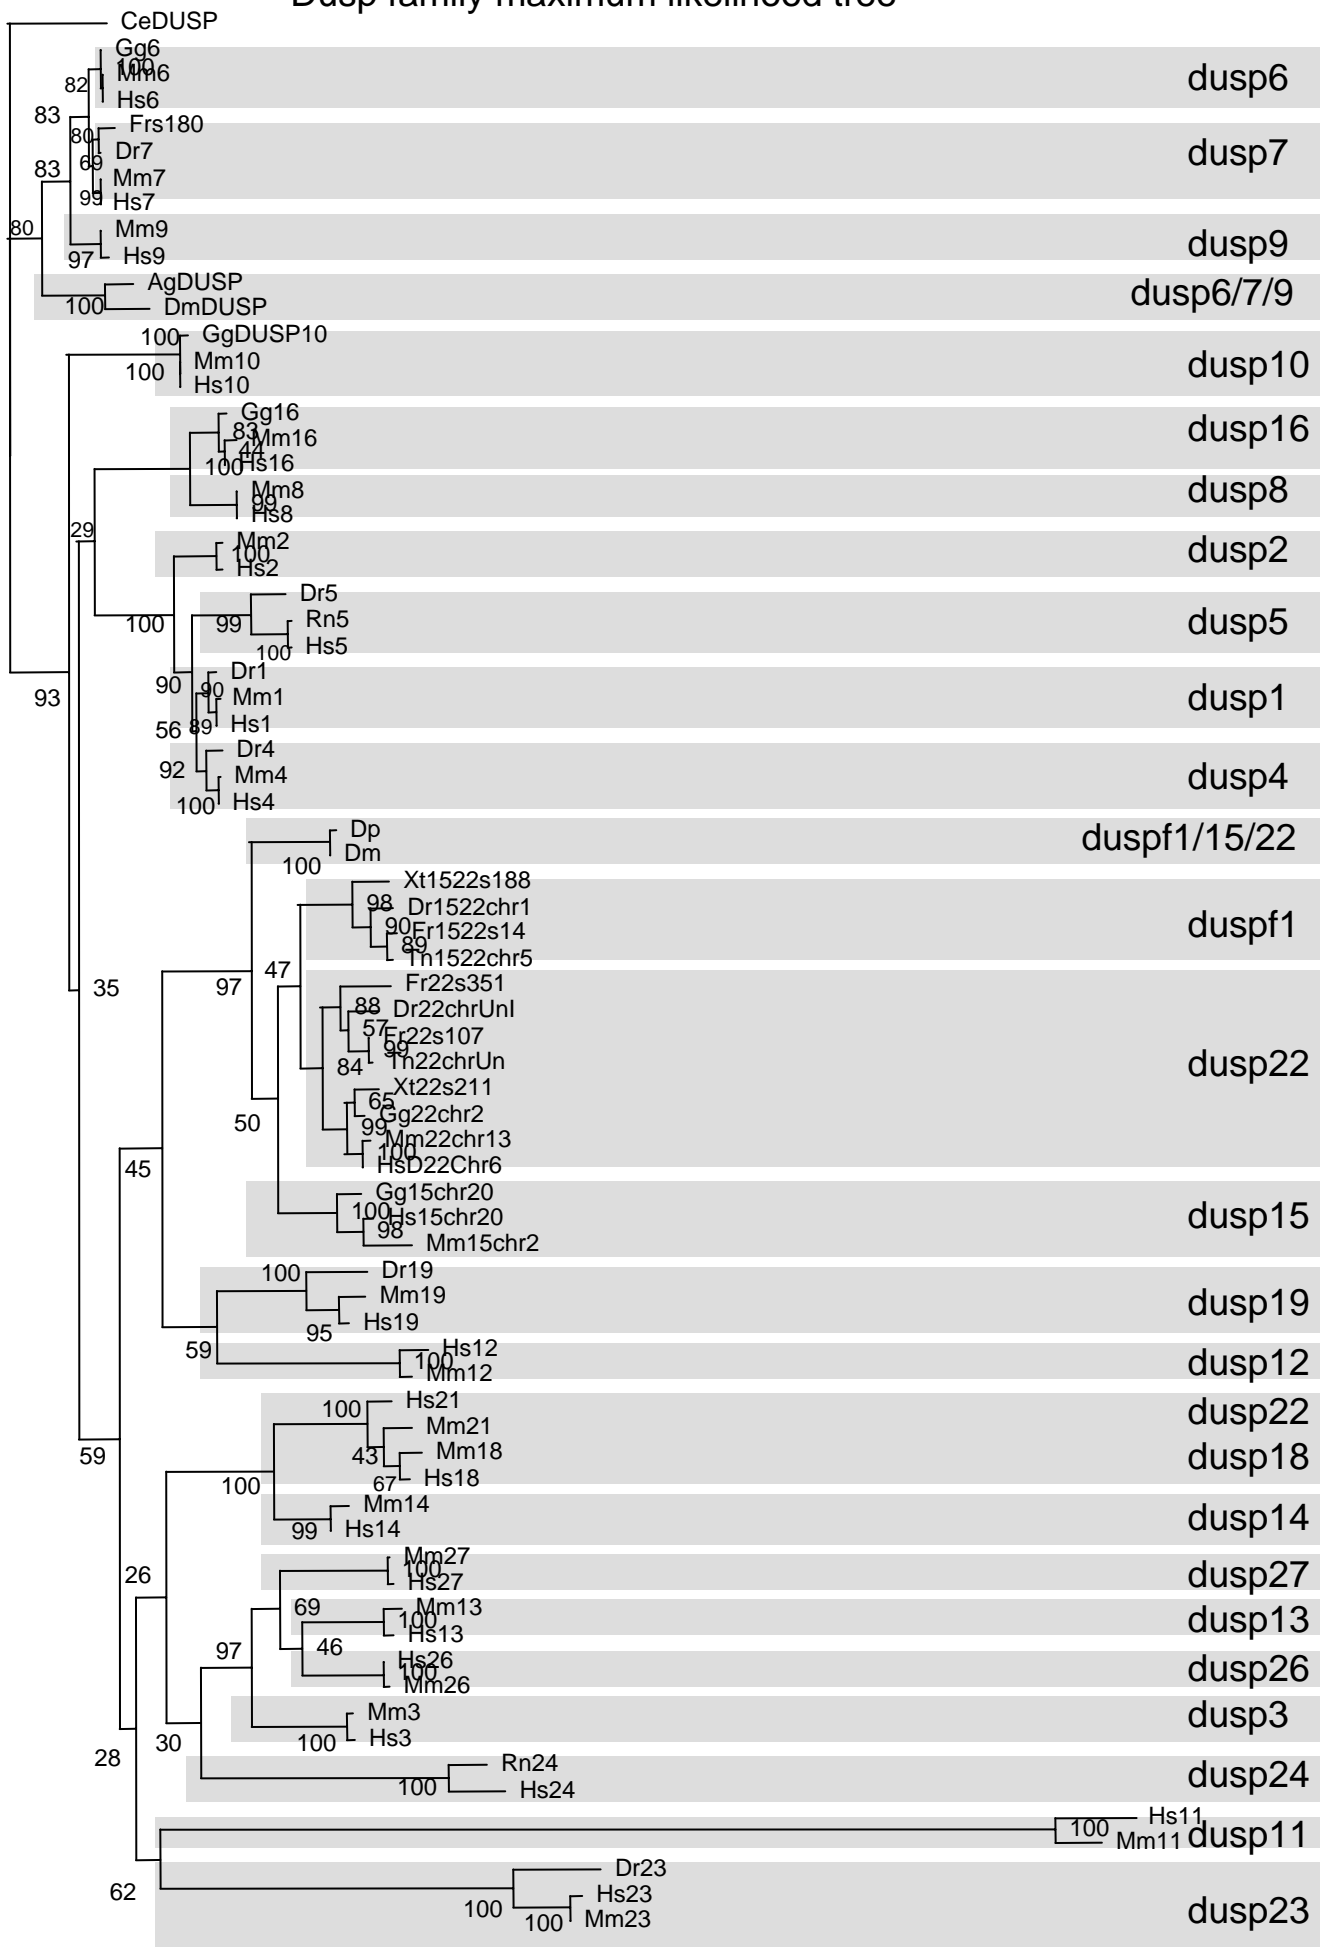

*Dusp22*, *Dusp15* and *Duspf1* subfamily maximum likelihood tree

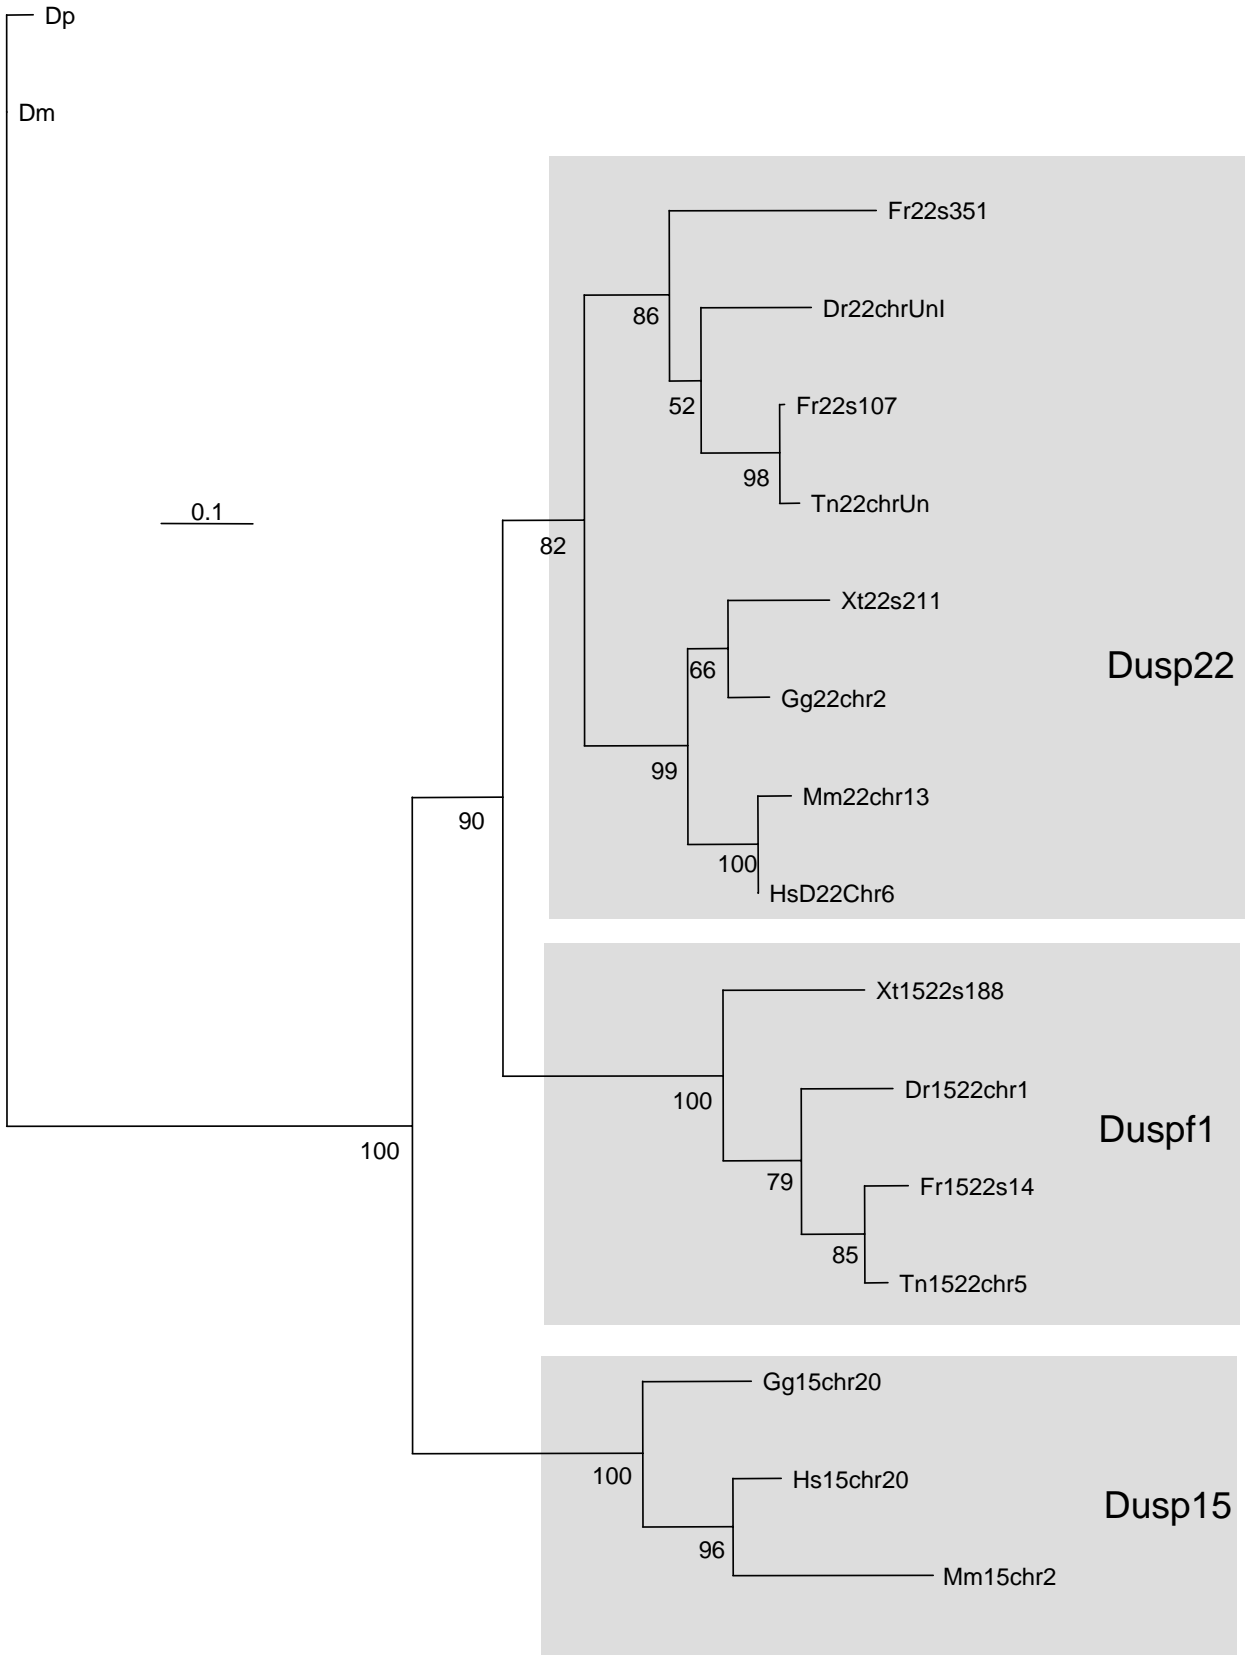

Supplement: 1471-2164-7-271-S2.pdf [file 1471-2164-7-271-S2.pdf]
